# Supplementary material
Source: PubMed Central journal article supplement (PMC5185469)
Supplement: NIHMS835359-supplement-bf015002sd_pdf.pdf [file NIHMS835359-supplement-bf015002sd_pdf.pdf]

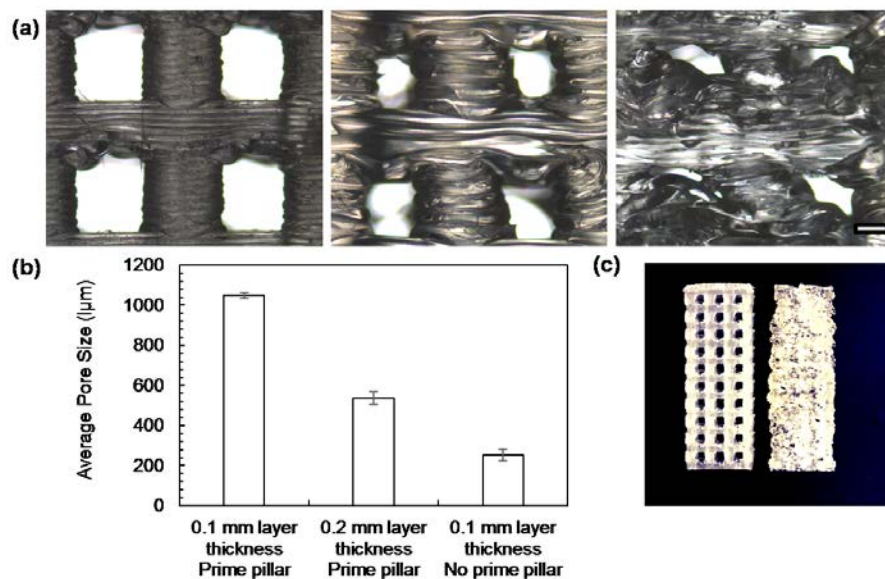

**Figure S1.** Modulation of 3D printing parameters. (a) Bright-field images of devices printed with 0.1 mm layer thickness with prime pillar (final printing parameters) (left), 0.2 mm layer thickness with prime pillar (middle), 0.1 mm layer thickness without prime pillar (right). (b) Average pore size for devices printed with different layer thickness and with or without prime pillar. Length and width were averaged for each condition. n=40 (c) Representative image of the devices printed with 0.1 mm layer thickness with (left) or without (right) prime pillar. Scale bar = 500 µm.
